# Supplementary material for: Characterization of Callose Deposition and Analysis of the Callose Synthase Gene Family of Brassica napus in Response to Leptosphaeria maculans
Source: Int J Mol Sci. 2018 Nov 27;19(12):3769. doi: 10.3390/ijms19123769 (PMC6320764; doi:10.3390/ijms19123769)
Supplement: Supplementary file 1 [file ijms-19-03769-s001.zip]

Archive with 7 entries (7 files):
- Figure S1.tif
- Figure S2.tif
- Figure S3.tif
- Figure S4.tif
- Table S1.xlsx
- Table S2.xlsx
- title.pdf
