# Supplementary material for: Characterization of Callose Deposition and Analysis of the Callose Synthase Gene Family of Brassica napus in Response to Leptosphaeria maculans
Source: Int J Mol Sci. 2018 Nov 27;19(12):3769. doi: 10.3390/ijms19123769 (PMC6320764; doi:10.3390/ijms19123769)
Supplement: Supplementary file 1 [file ijms-19-03769-s001.zip › Table S1.xlsx]

## Sheet: Sheet1
Gene name	Chromosome	Start	End	Exon number	Duplication types
BnA01.Cals	chrA01	21840566	21851689	50	WGD/segmental
BnA02.Cals	chrA02	611410	621483	42	WGD/segmental
BnA03.Cals	chrA03	14518724	14533516	53	WGD/segmental
BnA05.Cals.a	chrA05	4102062	4116992	50	WGD/segmental
BnA05.Cals.b	chrA05	6140869	6151054	41	WGD/segmental
BnA05.Cals.c	chrA05	21026919	21040029	51	WGD/segmental
BnA07.Cals	chrA07	14936546	14947221	43	dispersed
BnA09.Cals.a	chrA09	885241	891443	4	WGD/segmental
BnA09.Cals.b	chrA09	4098916	4102335	8	dispersed
BnA09.Cals.c	chrA09	13032259	13034757	1	WGD/segmental
BnA09.Cals.d	chrA09	13034825	13039431	3	WGD/segmental
BnA09.Cals.e	chrA09	33097869	33109048	44	WGD/segmental
BnA10.Cals.a	chrA10	1981621	1990855	38	WGD/segmental
BnA10.Cals.b	chrA10	2236123	2246594	41	WGD/segmental
BnA10.Cals.c	chrA10	14179538	14189730	42	WGD/segmental
BnC02.Cals	chrC02	2320984	2332589	42	WGD/segmental
BnC03.Cals	chrC03	21340067	21357495	50	WGD/segmental
BnC04.Cals.a	chrC04	6327473	6341768	51	WGD/segmental
BnC04.Cals.b	chrC04	9991265	10002061	41	WGD/segmental
BnC05.Cals.a	chrC05	1785087	1795972	43	WGD/segmental
BnC05.Cals.b	chrC05	2177264	2186798	38	WGD/segmental
BnC05.Cals.c	chrC05	37582231	37592373	41	dispersed
BnC05.Cals.d	chrC05	40945553	40953418	31	WGD/segmental
BnC05.Cals.e	chrC05_random	3698595	3706246	28	dispersed
BnC06.Cals	chrC06	19799823	19813691	55	WGD/segmental
BnC08.Cals	chrC08	37836026	37847244	44	WGD/segmental
BnC09.Cals.a	chrC09	441913	447975	4	WGD/segmental
BnC09.Cals.b	chrC09	5495765	5507132	38	WGD/segmental
BnC09.Cals.c	chrC09	19689085	19691597	1	WGD/segmental
BnC09.Cals.d	chrC09	19691665	19697726	3	WGD/segmental
BnC09.Cals.e	chrC09	45081692	45092144	42	WGD/segmental
BnUn.Cals	chrUnn_random	3528019	3532427	15	dispersed
