# Supplementary material for: Characterization of Callose Deposition and Analysis of the Callose Synthase Gene Family of Brassica napus in Response to Leptosphaeria maculans
Source: Int J Mol Sci. 2018 Nov 27;19(12):3769. doi: 10.3390/ijms19123769 (PMC6320764; doi:10.3390/ijms19123769)
Supplement: Supplementary file 1 [file ijms-19-03769-s001.zip › Table S2.xlsx]

## Sheet: Sheet1
Gene name	Sequence	Corresponding genes in A. thalina
BnC05.CalS.a	CGCTGAGATTAAGCCCCTTGTT	AtCalS 1
	CACAGTGCAATGACGACTCCTAAA
BnC04.CalS.b	CTTGCTGATATGAAGTTCACCTTTGTG	AtCalS 2
	ACACGCAGAGATGGGTACGTAGTC
BnA02.CalS	TCTTGGCTTGGTTTCCGTTTG	AtCalS 3
	TGACCTCCAAGGATACGAGAGATCT
BnA05.Cals.b	TCATTACTACGGCAGAACGCTGTT	AtCalS 4
	GAAGTGGCTGCGGGAGTAGAA
BnC09.Cals.b	TTGGATTCCAGGCAAACAATGT	AtCalS 5
	CGGCTCTATCGTCCAGCTTATTC
BnA07.Cals	CTGTCTTGGTTCCCTATTGTTTCTGA	AtCalS 6
	TCCGACCAGCGAGGATCAT
BnA10.Cals.b	ACATATGTCGTGTCATGCCAGGTAT	AtCalS 7
	TGCAACACGCAAGGATGGATA
BnC05.Cals.c	TGTTCGAGAACTCAAGCGTGTTTAT	AtCalS 8
	AGAAGCAATTCTGCGTGCGTTA
BnA05.Cals.c	GCTTCTTACCGTGGACAGACGTTA	AtCalS 9
	AGGCGTCGACTCTCCGTCTCTA
BnA05.Cals.a	TTTGCATGTGTACTCGGCTTCAT	AtCalS 10
	CCGTTTCCCACAACCCAAAC
BnA09.Cals.a	TCCCTTGCTCGGTTGTATGACA	AtCalS 11
	TCCTCGTTTGCATCGATTGAA
BnC09.Cals.a	GGCTTATCTGGAACGCGGTTA	AtCalS 12
	CCAGGCATCCACGACATGAAC
BnActin	TCCATCCATCGTCCACAG
	GCATCATCACAAGCATCCTT
BnGAPDH	TTTGACGCAAAGGCTGGAATC
	TCAAGTCGACCACACGGGTACT
